# Supplementary material for: Effect of Low-Frequency Renal Nerve Stimulation on Renal Glucose Release during Normoglycemia and a Hypoglycemic Clamp in Pigs
Source: MDPI journal article supplement (doi:10.3390/ijms25042041), 2024-02-07
Supplement: s1 [file s1]

| Number of animal         | 1    |       | 2    |       | 3    |       | 4    |       | 5     |       | 6    |       | 7    |       |
|--------------------------|------|-------|------|-------|------|-------|------|-------|-------|-------|------|-------|------|-------|
| Body side of stimulation | left | right | left | right | left | right | left | right | left  | right | left | right | left | right |
|                          | nd   | nd    | 0,37 | -0,50 | 0,11 | -0,13 | 0,20 | 0,59  | 0,24  | 0,27  | 0,07 | -0,27 | 0,59 | 0,14  |
|                          | 0,39 | 0,44  | 2,01 | -0,17 | 0,16 | 0,36  | 0,39 | 0,35  | 0,26  | 0,2   | 0,33 | 0,02  | 0,31 | -0,08 |
|                          | 0,30 | -0,04 | 0,28 | 0,13  | 0,04 | 0,23  | 0,01 | -0,19 | 0,09  | -0,52 | 0,29 | -0,5  | -0,3 | 0,14  |
|                          | 0,31 | 0,34  | 0,07 | 0,08  | 0,1  | 0,15  | 0,15 | 0,47  | 0,3   | -0,19 | 0,16 | -0,39 | 0,0  | 0,02  |
|                          | 0,19 | -0,28 | 0,18 | -0,17 | 0,05 | 0,09  | 0,74 | 0,53  | -0,38 | -0,3  | 0,0  | 0,53  | 0,64 | -0,36 |
|                          | 0,74 | 0,19  | 0,25 | 0,26  | 0,17 | 0,08  | 0,09 | 0,18  | 0,05  | 0,05  | 0,31 | 0,41  | 0,13 | 0,2   |
| Hypoglycemia             | 0,26 | 0,52  | 0,24 | 0,31  | 0,12 | 0,12  | 0,18 | 0,11  | 0,08  | 0,17  | 0,68 | 0,46  | 0,18 | 0,18  |
|                          | 0,39 | 0,37  | 0,24 | 0,21  | 0,09 | 0,04  | 0,15 | 0,1   | 0,16  | 0,18  | 0,87 | 0,63  | 0,11 | 0,24  |
|                          | 0,28 | 0,34  | 0,25 | 0,26  | 0,09 | 0,05  | 0,38 | 0,46  | 0,3   | 0,29  | 0,72 | 0,43  | 0,22 | 0,27  |
|                          | 0,31 | 0,32  | 0,36 | 0,34  | 0,08 | 0,08  | 0,14 | 0,11  | 0,3   | 0,27  | 0,62 | 0,29  | 0,4  | 0,36  |
|                          | 0,28 | 0,31  | 0,16 | 0,14  | 0,16 | 0,13  | 0,39 | 0,58  | 0,26  | 0,22  | 0,67 | 0,23  | 0,75 | 0,45  |

**Table S1.** Original data of side-dependent renal glucose release in mmol/l, episodes of hypoglycemia are highlighted in light gray and episodes of 15-minute low frequency renal stimulation in dark gray.

**SGN**

| Variable        | Value       | Std.Error   | DF | t-value   | p-value |
|-----------------|-------------|-------------|----|-----------|---------|
| Intercept       | 0.01320309  | 0.006063057 | 74 | 2.177629  | 0.0326  |
| Stimul          | 0.01714802  | 0.010566148 | 74 | 1.622921  | 0.1089  |
| Hypoglyk        | 0.02940364  | 0.008574458 | 68 | 3.429212  | 0.0010  |
| Stimul:Hypoglyk | -0.03012008 | 0.016828346 | 74 | -1.789842 | 0.0776  |

**SRP**

| Variable        | Value     | Std.Error | DF | t-value   | p-value |
|-----------------|-----------|-----------|----|-----------|---------|
| Intercept       | 165.04466 | 26.35264  | 74 | 6.262926  | 0.0000  |
| Stimul          | -27.78591 | 16.38879  | 74 | -1.695421 | 0.0942  |
| Hypoglyk        | 15.05001  | 28.43733  | 68 | 0.529234  | 0.5984  |
| Stimul:Hypoglyk | -35.98923 | 27.19634  | 74 | -1.323311 | 0.1898  |

**GFR**

| Variable        | Value     | Std.Error | DF | t-value   | p-value |
|-----------------|-----------|-----------|----|-----------|---------|
| Intercept       | 23.067527 | 3.809733  | 74 | 6.054893  | 0.0000  |
| Stimul          | -6.774361 | 2.788799  | 74 | -2.429132 | 0.0176  |
| Hypoglyk        | 16.757777 | 3.670796  | 68 | 4.565162  | 0.0000  |
| Stimul:Hypoglyk | -6.123723 | 4.598385  | 74 | -1.331711 | 0.1870  |

**Urinary Na**

| Variable        | Value     | Std.Error | DF | t-value   | p-value |
|-----------------|-----------|-----------|----|-----------|---------|
| Intercept       | 106.98868 | 4.585962  | 74 | 23.329602 | 0.0000  |
| Stimul          | -13.12459 | 1.876240  | 74 | -6.995158 | 0.0000  |
| Hypoglyk        | -7.23375  | 2.146225  | 68 | -3.370455 | 0.0012  |
| Stimul:Hypoglyk | 2.34161   | 3.079605  | 74 | 0.760361  | 0.4495  |

**Urine volume**

| Variable  | Value    | Std.Error | DF | t-value  | p-value |
|-----------|----------|-----------|----|----------|---------|
| Intercept | 33.39348 | 4.288784  | 74 | 7.786234 | 0.0000  |

| Variable        | Value     | Std.Error | DF | t-value   | p-value |
|-----------------|-----------|-----------|----|-----------|---------|
| Stimul          | -9.84710  | 2.744522  | 74 | -3.587910 | 0.0006  |
| Hypoglyk        | -10.34753 | 4.674727  | 68 | -2.213504 | 0.0302  |
| Stimul:Hypoglyk | -1.16733  | 4.552823  | 74 | -0.256397 | 0.7984  |

#### PAH

| Variable        | Value    | Std.Error | DF | t-value   | p-value |
|-----------------|----------|-----------|----|-----------|---------|
| Intercept       | 980.0520 | 211.9308  | 74 | 4.624395  | 0.0000  |
| Stimul          | 325.3348 | 110.2823  | 74 | 2.950019  | 0.0043  |
| Hypoglyk        | 140.5117 | 178.4706  | 68 | 0.787310  | 0.4338  |
| Stimul:Hypoglyk | -55.3655 | 182.8190  | 74 | -0.302843 | 0.7629  |

#### Inulin

| Variable        | Value    | Std.Error | DF | t-value  | p-value |
|-----------------|----------|-----------|----|----------|---------|
| Intercept       | 416.2649 | 58.14078  | 74 | 7.159602 | 0.0000  |
| Stimul          | 52.7942  | 44.21025  | 74 | 1.194163 | 0.2362  |
| Hypoglyk        | 248.4808 | 81.71049  | 68 | 3.040991 | 0.0033  |
| Stimul:Hypoglyk | 136.1258 | 73.39742  | 74 | 1.854640 | 0.0676  |

**Table S2. Comprehensive statistical data on the linear mixed model parameters.**
